# Supplementary material for: New species of Cylindrocladiella from plantation soils in South-East Asia
Source: PubMed Central journal article supplement (PMC5904420; doi:10.3897/mycokeys.32.23754), 2018-03-15

# ITS

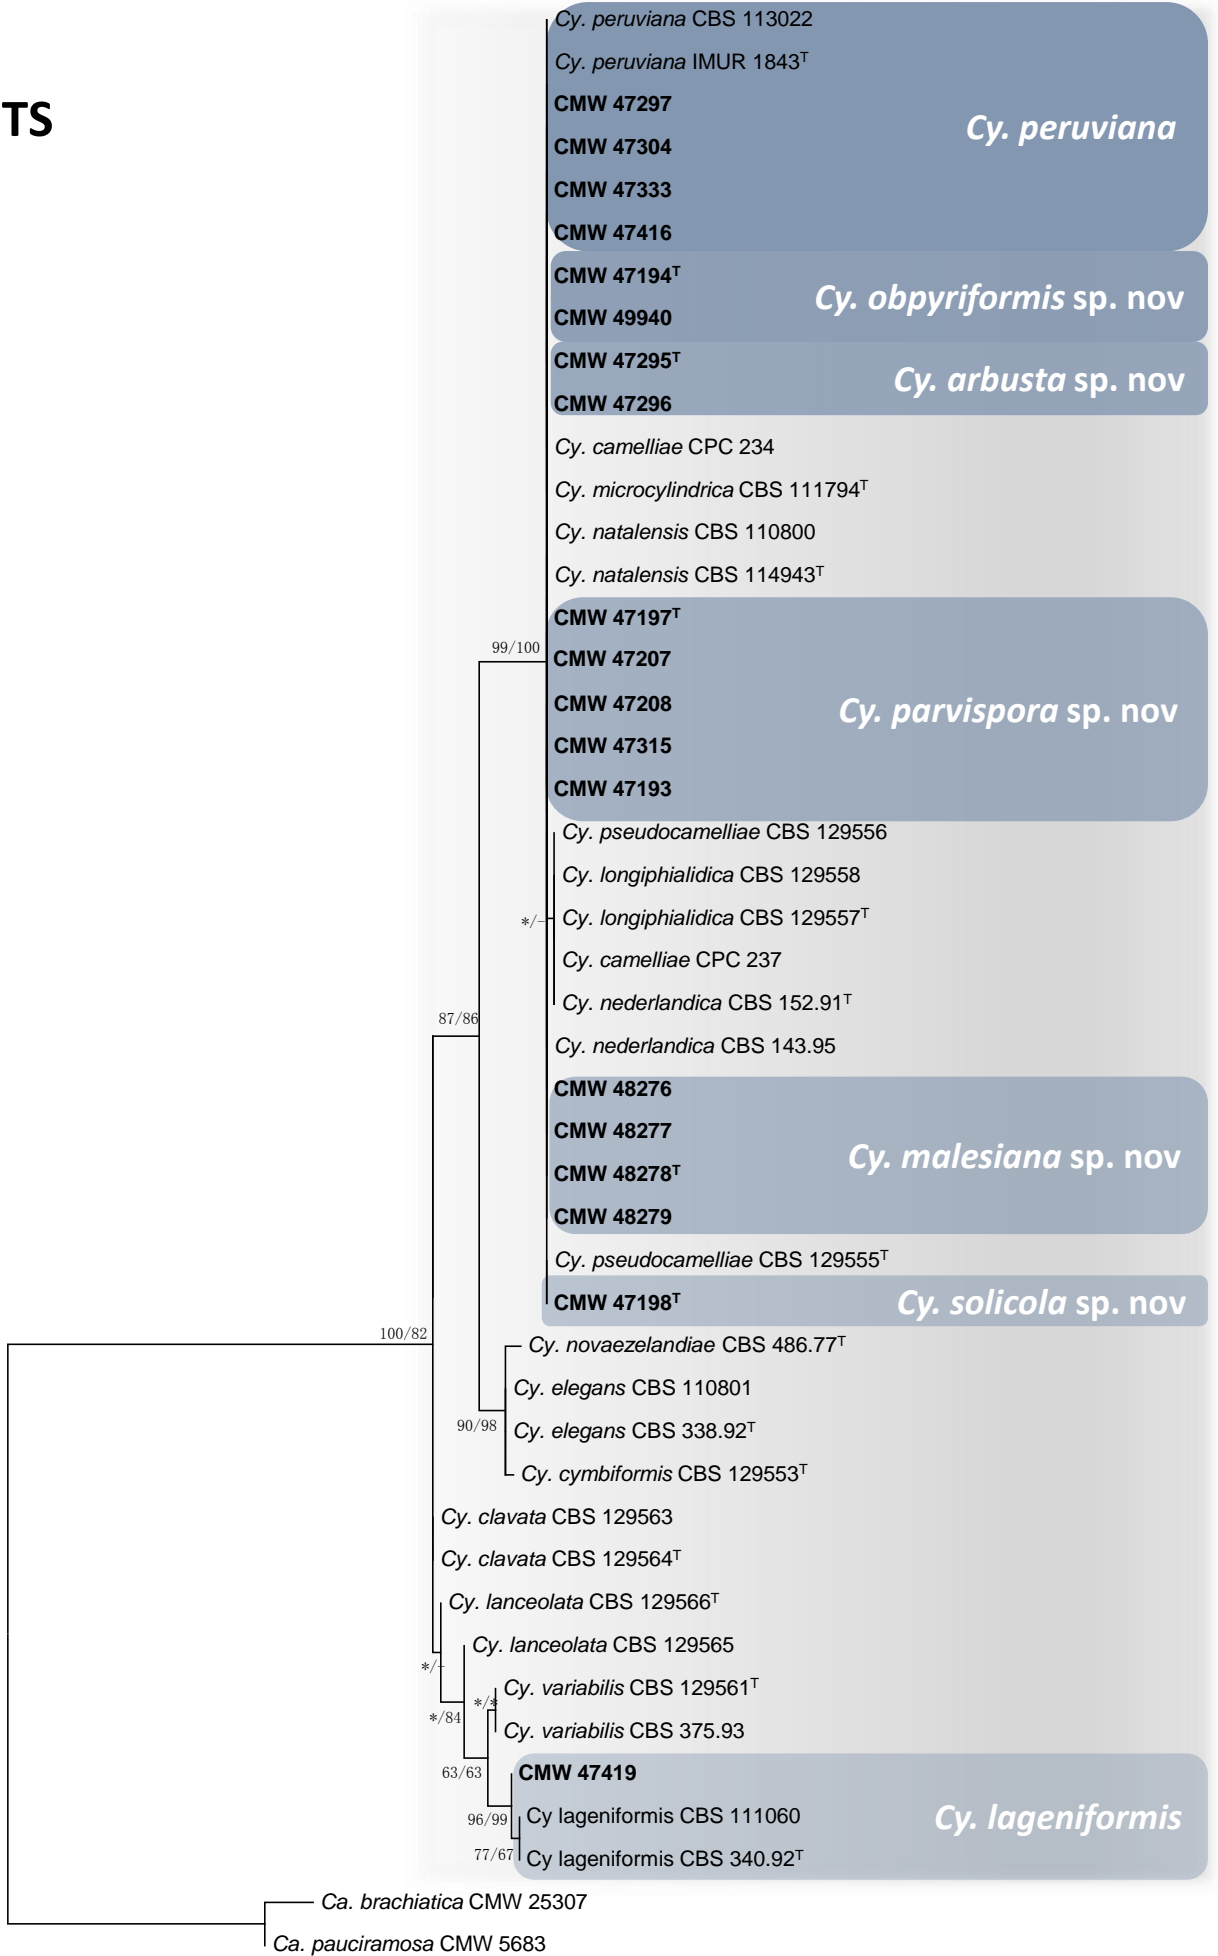

Supplement: mycokeys-32-001-s004.pdf [file mycokeys-32-001-s004.pdf]
